# Supplementary material for: Triglyceride to HDL Cholesterol Ratio for the Identification of MASLD in Obesity: A Liver Biopsy-Based Case-Control Study
Source: MDPI journal article supplement (doi:10.3390/nu16091310), 2024-04-27

Supplementary Figure S2. Receiver operating characteristic (ROC) curves of the triglyceride to high-density lipoprotein cholesterol (TG/HDL-C) ratio, hepatic steatosis index (HSI) and fibrosis-4 index (FIB-4) for detecting MASLD in the study population.

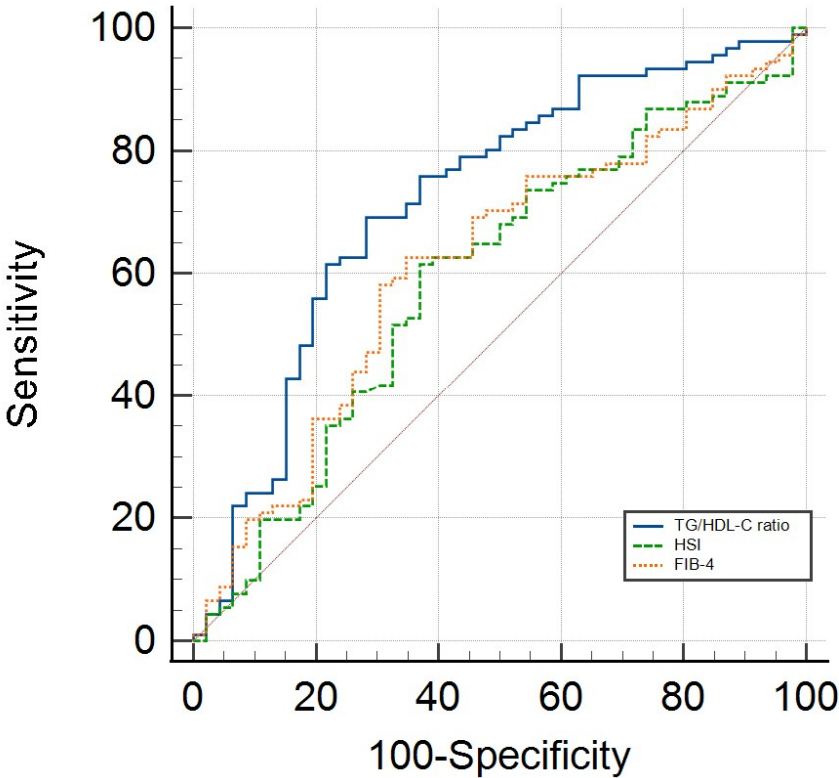

Supplement: s1 [file s1]
