# Supplementary material for: Triglyceride to HDL Cholesterol Ratio for the Identification of MASLD in Obesity: A Liver Biopsy-Based Case-Control Study
Source: MDPI journal article supplement (doi:10.3390/nu16091310), 2024-04-27
Supplement: s1 [file s1]

Supplementary Table S2. Receiver operating characteristic (ROC) analyses describing the ability of the TG/HDL-C ratio, HSI, and FIB-4 to detect MASLD in the study population.

|                | AUC   | 95% CI        | Cut-off value | Sensitivity | Specificity | P value | P value for comparisons* |
|----------------|-------|---------------|---------------|-------------|-------------|---------|--------------------------|
| TG/HDL-C ratio | 0.747 | 0.670 – 0.814 | 3.7           | 70.0%       | 74.5%       | <0.001  |                          |
| HSI            | 0.592 | 0.506 – 0.675 | 52.6          | 62.4%       | 61.7%       | 0.074   | 0.069                    |
| FIB-4          | 0.615 | 0.530 – 0.696 | 0.74          | 62.0%       | 65.3%       | 0.020   | 0.143                    |

AUC, area under the curve; CI, confidence; FIB-4, fibrosis-4 index; HSI, hepatic steatosis index MASLD, metabolic dysfunction-associated steatotic liver disease; TG/HDL-C, triglyceride to high-density lipoprotein cholesterol ratio. Binomial exact confidence intervals for the AUC are given. \*P value for comparisons with TG/HDL-C ratio (only participants with all data available, n= 137).
