# Supplementary material for: Triglyceride to HDL Cholesterol Ratio for the Identification of MASLD in Obesity: A Liver Biopsy-Based Case-Control Study
Source: MDPI journal article supplement (doi:10.3390/nu16091310), 2024-04-27
Supplement: s1 [file s1]

Supplementary Table S1. Receiver operating characteristic (ROC) analyses describing the ability of TG/HDL-C ratio, TG, and HDL-C to detect MASLD in women (no MASLD, n=50; MASLD, n=66)

|                | AUC   | 95% CI        | Cut-off value | Sensitivity | Specificity | P value |
|----------------|-------|---------------|---------------|-------------|-------------|---------|
| TG/HDL-C ratio | 0.700 | 0.607 – 0.782 | 3.7           | 60.6%       | 75%         | <0.001  |
| Triglycerides  | 0.704 | 0.611 – 0.785 | 161           | 63.6%       | 75.5%       | <0.001  |
| HDL-C          | 0.631 | 0.536 – 0.719 | 46            | 74.2 %      | 61.2%       | 0.0179  |

MASLD, metabolic dysfunction-associated steatotic liver disease; AUC, area under the curve; CI, confidence interval; TG, triglycerides; HDL-C, high-density lipoprotein cholesterol.
