# Supplementary material for: Triglyceride to HDL Cholesterol Ratio for the Identification of MASLD in Obesity: A Liver Biopsy-Based Case-Control Study
Source: MDPI journal article supplement (doi:10.3390/nu16091310), 2024-04-27

Supplementary Figure S1. Receiver operating characteristic (ROC) curves of triglycerides (TG); high-density lipoprotein cholesterol (HDL-C) and TG/HDL-C ratio for detecting MASLD in women of the study population.

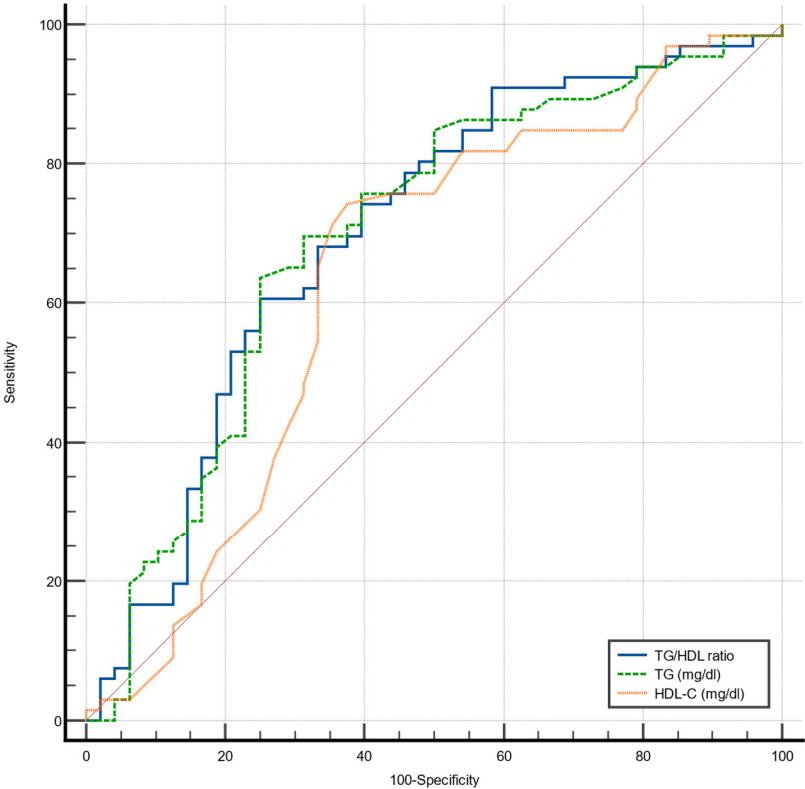

Supplement: s1 [file s1]
